# Supplementary material for: The 11-β-Hydroxysteroid Dehydrogenase Type 1 Inhibitor INCB13739 Improves Hyperglycemia in Patients With Type 2 Diabetes Inadequately Controlled by Metformin Monotherapy
Source: PubMed Central journal article supplement — Diabetes Care. 2010 Apr 22;33(7):1516–22. doi: 10.2337/dc09-2315 (PMC2890352; doi:10.2337/dc09-2315), 2010-04-22
Supplement: supp_dc09-2315_2315_online_appendix.pdf [file supp_dc09-2315_2315_online_appendix.pdf]

**Online Appendix Figure 1 – Patient Disposition**

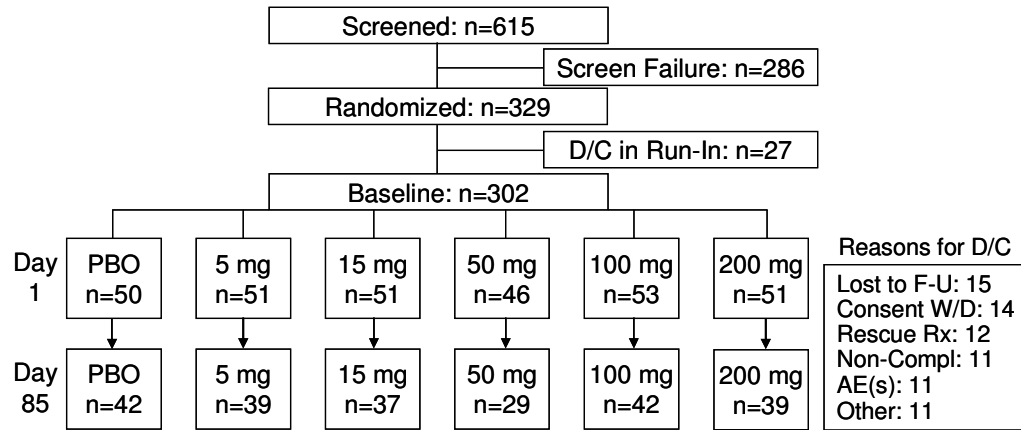

D/C, discontinued; F-U, follow-up; W/D, withdrawn; Rx, therapy; Non-compl, non-compliance.

**Online Appendix Table 1 – Clinical Characteristics at Baseline**

|                        | Placebo   | 5 mg      | 15 mg     | 50 mg     | 100 mg    | 200 mg    |
|------------------------|-----------|-----------|-----------|-----------|-----------|-----------|
| N                      | 50        | 51        | 51        | 46        | 53        | 51        |
| Age, yrs               | 52 ± 11   | 55 ± 9    | 52 ± 10   | 54 ± 9    | 54 ± 9    | 52 ± 10   |
| Male, n (%)            | 25 (50)   | 30 (59)   | 24 (47)   | 22 (48)   | 28 (53)   | 21 (41)   |
| Female, n (%)          | 25 (50)   | 21 (41)   | 27 (53)   | 24 (52)   | 25 (47)   | 30 (59)   |
| Duration T2D, yrs      | 6.7 ± 6   | 5.3 ± 5   | 6.4 ± 5   | 5.8 ± 5   | 6.9 ± 6   | 6.0 ± 5   |
| Metformin Dose, g/d    | 1.5 ± 0.5 | 1.4 ± 0.6 | 1.5 ± 0.6 | 1.4 ± 0.5 | 1.6 ± 0.5 | 1.6 ± 0.6 |
| A1c, %                 | 8.3 ± 1   | 8.2 ± 1   | 8.3 ± 1   | 8.3 ± 1   | 8.2 ± 1   | 8.2 ± 1   |
| FPG, mg/dL             | 179 ± 51  | 172 ± 41  | 175 ± 44  | 178 ± 53  | 170 ± 64  | 165 ± 41  |
| Weight, kg             | 91 ± 16   | 91 ± 19   | 96 ± 22   | 84 ± 14   | 89 ± 20   | 86 ± 17   |
| BMI, kg/m <sup>2</sup> | 33 ± 5    | 33 ± 6    | 34 ± 5    | 31 ± 4    | 32 ± 5    | 32 ± 5    |
| Cholesterol, mg/dL     | 198 ± 52  | 190 ± 40  | 177 ± 37  | 193 ± 54  | 205 ± 45  | 194 ± 36  |
| LDL-C, mg/dL           | 112 ± 33  | 107 ± 34  | 99 ± 34   | 111 ± 44  | 121 ± 37  | 110 ± 27  |
| HDL-C, mg/dL           | 49 ± 16   | 47 ± 13   | 44 ± 9    | 46 ± 12   | 48 ± 10   | 47 ± 11   |
| Triglyceride, mg/dL    | 188 ± 105 | 189 ± 125 | 196 ± 153 | 188 ± 121 | 187 ± 92  | 195 ± 127 |
| sBP, mm Hg             | 127 ± 12  | 125 ± 15  | 127 ± 15  | 123 ± 11  | 127 ± 15  | 125 ± 13  |
| dBp, mm Hg             | 78 ± 8    | 75 ± 8    | 78 ± 8    | 76 ± 8    | 80 ± 8    | 78 ± 7    |

Data are mean ± STD unless otherwise noted.

**Online Appendix Table 2 – Endpoint Electrolyte Assessments**

|             | Ref Range        | Placebo    | 5 mg       | 15 mg      | 50 mg      | 100 mg     | 200 mg     |
|-------------|------------------|------------|------------|------------|------------|------------|------------|
| Potassium   | 3.4-5.4 mmol/L   | 4.4 ± 0.4  | 4.5 ± 0.4  | 4.3 ± 0.4  | 4.3 ± 0.3  | 4.4 ± 0.4  | 4.3 ± 0.4  |
| Sodium      | 132-147 mmol/L   | 140 ± 3    | 142 ± 5    | 141 ± 3    | 141 ± 4    | 142 ± 4    | 141 ± 3    |
| Chloride    | 94-112 mmol/L    | 102 ± 3    | 103 ± 4    | 103 ± 2    | 102 ± 3    | 103 ± 3    | 102 ± 3    |
| Bicarbonate | 17.0-30.6 mmol/L | 24.3 ± 2.8 | 23.9 ± 3.1 | 24.5 ± 3.2 | 24.4 ± 3.2 | 24.4 ± 2.7 | 24.2 ± 3.4 |

Electrolyte data are Week 12 mean ± STD. Central lab normal reference ranges are provided.

**Online Appendix Table 3 – Participating Principal Investigators**

Andrade, Augustin. Research Physicians Network Alliance; Miami Beach, FL  
Angles, Luis. Heart of America Research Institute; Shawnee Mission, KS  
Apantaku, Frank. Illinois Center for Clinical Research; Chicago, IL  
Armas, Eddie. Well Pharma Medical Research Corporation; South Miami, FL  
Arshad, Syed. Houston Clinical Research Associates; Houston, TX  
Bailey, Timothy. North County Endocrine Medical Group; Escondido, CA  
Banker, Lisa. Carolina Research Trials, PC; New Bern, NC  
Barker, Timothy. Research Institute of the Carolinas, PLLC; Mooresville, NC  
Barranco, Elizabeth. Ponce School of Medicine/CAIMED Center; Ponce, Puerto Rico  
Bartkowiak, Anthony. Blair Medical Associates; Altoona, PA  
Boeren, John. Belleville Family Medical Associates LTD; Belleville, IL  
Braun, Edward. Midtown Medical Center; Tampa, FL  
Brockmyre, Andrew. Holston Medical Group; Bristol, TN  
Brown, Morris. Laureate Clinical Research Group, LLC; Atlanta, GA  
Bueso, Gerardo. Endocrine Associates; Houston, TX  
Cherlin, Richard. Cherlin, Richard MD; Los Gatos, CA  
Christensen, Tom. Odyssey Research; Calabash, NC  
Clevinger, Sidney. Renstar Medical Research; Ocala, FL  
Connery, Lisa. Lynn Health Science Institute; Norman, OK  
Daryae, Nader. Southeast Clinical Research, LLC; Chiefland, FL  
Demetry, Kamal. Midwest Internists Clinical Research, P.C.; St. Louis, MO  
Fedro, David. First Dynamic Health Care Services, Inc.; Waco, TX  
Feldman, Gregory; S. Carolina Pharmaceutical Research; Spartanburg, SC  
Gabra, Nashwa. Burke Internal Medicine; Burke, VA  
Gabriel, John. North Hills Family Practice; North Richland Hills, TX  
Gollapudi, Gopalakrishna. Diabetes Center of the Southwest; Midland, TX  
Henderson, Mark. Acadia Clinical Research, LLC; Bangor, ME  
Horowitz, Barry. Metabolic Research Institute, Inc.; West Palm Beach, FL  
Irizarry, Carmen. Irizarry, Carmen (private practice); Fajardo, Puerto Rico  
Ison, Rodney. Ison, Rodney, MD; Canal Fulton, OH  
Jain, Rajeev. Advanced Healthcare, SC-Clinical Research Center; Milwaukee, WI  
Johary, Albert. Albert Johary, M.D.; Dunwoody, GA  
Johnson, Glover. Non-Invasive Cardiovascular PA; Santa Ana, TX  
Kalafer, Marvin. Clinical Trial Center, LLC, Psychiatry; Jenkintown, PA  
Kerwin, Edward. Clinical Research Institute of Southern Oregon, LLC; Medford, OR  
Kipnes, Mark. Diabetes & Glandular Disease Research Associates, Inc.; San Antonio, TX  
Koehler, Lawrence. Wells Institute for Health Awareness; Kettering, OH  
Kroeze, James. Southwestern Medical Clinic, P.C.; Bridgman, MI  
Lacour, Audrey. Juno Research, LLC; Houston, TX  
Landgarten, Steven. Hillcrest Medical Group/Utica Park Clinic; Tulsa, OK  
Lerman, Sam. Center for Diabetes & Endocrine Care; Hollywood, FL  
Lesh, Kurt. Lynn Institute of the Rockies; Colorado Spring, CO  
Levy, Philip. Phoenix Endocrinology Clinic, Ltd.; Phoenix, AZ  
Lewin, Andrew. National Research Institute; Los Angeles, CA  
Littlejohn, Thomas. Piedmont Medical Research Associates; Winston-Salem, NC  
Long, William. Neem Research Group of Charlotte; Charlotte, NC  
Lorraine, Richard. Harleysville Medical Associates; Harleysville, PA  
Lowder, Catherine. St. Louis Center for Clinical Research; St. Louis, MO  
Lucas, Mel. Primecare Research Associates; Florissant, MO

Margolis, Steven. Alternacare, P.C.; Sterling Heights, MI  
Martin, Earl. Martin Diagnostic Clinic; Houston, TX  
Matta, Evelyn. Capara Internal Medicine Service Group, Rio Grande, Puerto Rico  
Mattson, Elizabeth. King's Daughters Clinic; Temple, TX  
Mays, Brooks. Pinehurst Medical Clinic, Inc.; Pinehurst, NC  
McCormick, Brian. Hampton Family Practice, PLLC; Hampton, VA  
Messiha, Magdi. Neuropsychiatric Research Center of Orange County; Santa Ana, CA  
Moll, David. Grandview Medical Research, Inc.; Sellersville, PA  
Norwood, Paul. Valley Research; Fresno, CA  
Only, Ronald. Partners in Family Medicine; Georgetown, TX  
Patel, Rakesh. DynaMed Clinical Research; Houston, TX  
Pearson, Darren. St. Louis Center for Clinical Research; St. Louis, MO  
Pudi, Krishna. Upstate Pharmaceutical Research; Greenville, SC  
Ramsbottom, John. Odyssey Research; North Myrtle Beach, SC  
Roberts, Victor. Endocrine Clinical Research; Winter Park, FL  
Rock, Karin. Greystone Medical Research; Birmingham, AL  
Rosemore, Michael. Simon-Williamson Clinic, PC; Hueytown, AL  
Rosenstock, Julio. Dallas Diabetes and Endocrine Center; Dallas, TX  
Rousseau, Roger. Pharmax Research Clinic, LLC; Miami, FL  
Saavedra, Rubin. Nevada Alliance Against Diabetes; Las Vegas, NV  
Sall, Kenneth. Sall Research Medical Center; Artesia, CA  
Saway, William. Columbia Medical Practice; Columbia, MD  
Scott, David. Clinical Research Development Associates, LLC; Springfield Gardens, NY  
Shah, Anil. Medical Helping Hands; Santa Ana, CA  
Snyder, Brian. Southgate Medical Group; West Seneca, NY  
Sosa-Padilla, Miguel. Sosa-Padilla, Miguel (private practice); San Juan, Puerto Rico  
Streja, Dan. Infosphere Clinical Research; Calabasas, CA  
Tamayo, Raul. Genesis Research International; Longwood, FL  
Thomas, Flavia. Juno Research, LLC; Houston, TX  
Toro, Hugo. Juno Research, LLC; Houston, TX  
Velazquez, Sonia. Clinical Research Puerto Rico, Inc.; San Juan, Puerto Rico  
Weissman, Peter. Baptist Diabetes Associates Research Center; Miami, FL
